# Supplementary material for: Crystal structure, electronic properties and cytotoxic activity of palladium chloride complexes with monosubstituted pyridines
Source: Royal Society of Chemistry journal article supplement (doi:10.1039/c1dt11412c), 2011-11-09
Supplement: c1dt11412c.pdf [file c1dt11412c.pdf]

# ***Crystal structure, electronic properties and cytotoxic activity of palladium chloride complexes with monosubstituted pyridines.***

Agnieszka Krogul<sup>a</sup>, Jakub Cędrowski<sup>a</sup>, Katarzyna Wiktorska<sup>b</sup>, Wojciech Ozimiński<sup>b</sup>, Jadwiga Skupińska<sup>a</sup> and Grzegorz Litwinienko<sup>\*a</sup>

<sup>a</sup> University of Warsaw, Department of Chemistry, Pasteura 1, 02-093 Warsaw, Poland

<sup>b</sup> National Medicines Institute, Chelmska 30/34, 00-725 Warsaw, Poland

\* Corresponding author. E-mail: litwin@chem.uw.edu.pl

## **SUPPLEMENTARY INFORMATION TABLE OF CONTENTS**

| Title                                                                                                                                                                                                          | page |
|----------------------------------------------------------------------------------------------------------------------------------------------------------------------------------------------------------------|------|
| <b>Table S1.</b> Elemental analysis of compounds: PdCl <sub>2</sub> (Py) <sub>2</sub> (complex I), PdCl <sub>2</sub> (2-MePy) <sub>2</sub> (complex II), PdCl <sub>2</sub> (3-CIPy) <sub>2</sub> (complex VI). | S-2  |
| <b>Figure S1.</b> Figure S1. Structures of complexes III, IV and V.                                                                                                                                            | S-2  |
| <b>Table S2.</b> Selected bond distances and angles for complex III.                                                                                                                                           | S-3  |
| <b>Table S3.</b> Selected bond distances and angles for complex IV.                                                                                                                                            | S-3  |
| <b>Table S4.</b> Selected bond distances and angles for complex V.                                                                                                                                             | S-4  |
| <b>Figure S2.</b> UV-Vis spectra of free XPy ligands                                                                                                                                                           | S-4  |
| <b>Figure S3.</b> UV-Vis spectra of PdCl <sub>2</sub> (XPy) <sub>2</sub> complexes.                                                                                                                            | S-5  |
| <b>Figure S4.</b> Frontier Orbitals involved in dπ-π* transitions in PdCl <sub>2</sub> (Py) <sub>2</sub> .                                                                                                     | S-6  |
| <b>Figure S5.</b> Frontier Orbitals involved in dπ-π* transitions in PdCl <sub>2</sub> (3-CIPy) <sub>2</sub> .                                                                                                 | S-6  |
| <b>Figure S6.</b> Visualisation of dπ-π* transitions in PdCl <sub>2</sub> (Py) <sub>2</sub> .                                                                                                                  | S-7  |
| <b>Figure S7.</b> Visualisation of dπ-π* transitions in PdCl <sub>2</sub> (3-CIPy) <sub>2</sub> .                                                                                                              | S-7  |
| <b>Figure S8.</b> Theoretical UV-Vis spectrum of PdCl <sub>2</sub> (Py) <sub>2</sub> .                                                                                                                         | S-8  |
| <b>Figure S9.</b> Theoretical UV-Vis spectrum of PdCl <sub>2</sub> (3-MePy) <sub>2</sub> .                                                                                                                     | S-8  |
| <b>Figure S10.</b> Theoretical UV-Vis spectrum of PdCl <sub>2</sub> (3-CIPy) <sub>2</sub> .                                                                                                                    | S-9  |

Table S1. Elemental analysis of compounds: PdCl<sub>2</sub>(Py)<sub>2</sub> (complex I), PdCl<sub>2</sub>(2-MePy)<sub>2</sub> (complex II), PdCl<sub>2</sub>(3-CIPy)<sub>2</sub> (complex VIII).<sup>a</sup>

| Complex                                 | Results      | %C    | %H   | %N   | %Cl   |
|-----------------------------------------|--------------|-------|------|------|-------|
| PdCl <sub>2</sub> (Py) <sub>2</sub>     | experimental | 35,80 | 3,01 | 8,36 | 21,21 |
|                                         | theoretical  | 35,76 | 2,98 | 8,34 | 21,16 |
| PdCl <sub>2</sub> (2-MePy) <sub>2</sub> | experimental | 39,64 | 3,94 | 7,64 | 19,43 |
|                                         | theoretical  | 39,61 | 3,85 | 7,7  | 19,53 |
| PdCl <sub>2</sub> (3-CIPy) <sub>2</sub> | experimental | 29,76 | 1,95 | 6,85 | 35,19 |
|                                         | theoretical  | 29,67 | 1,97 | 6,92 | 35,11 |

<sup>a</sup>Data have been published in ref. 1.

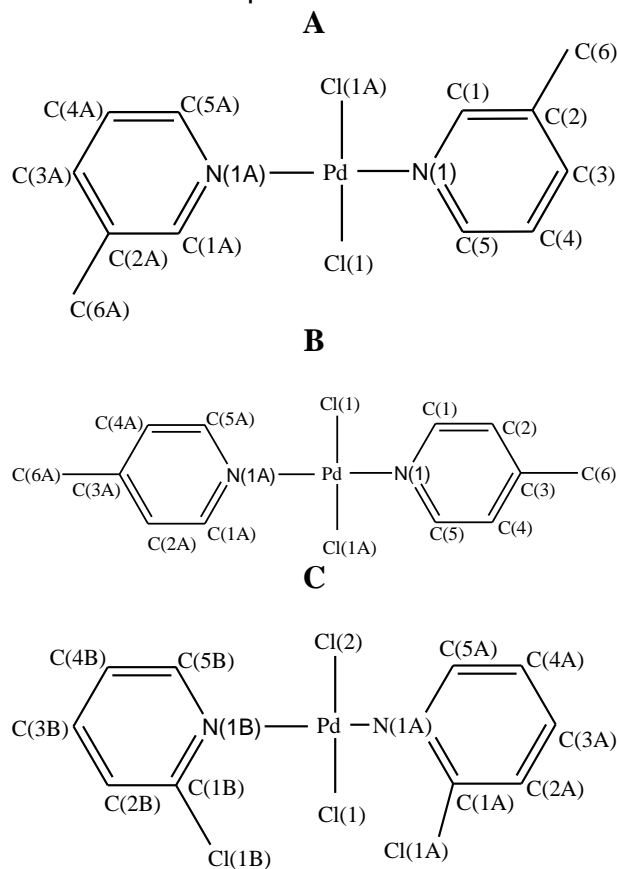

Figure S1. Structures of complexes III (A), IV (B) and V (C).

Table S2. Selected bond distances (Å) and angles (°) for complex III.

|                 |            |                |            |
|-----------------|------------|----------------|------------|
| Pd-N(1A)        | 2.0191(11) | C(1)-C(2)      | 1.3907(18) |
| Pd-N(1)         | 2.0191(11) | C(2)-C(3)      | 1.3916(19) |
| Pd-Cl(1A)       | 2.3027(5)  | C(2)-C(6)      | 1.5019(18) |
| Pd-Cl(1)        | 2.3027(5)  | C(3)-C(4)      | 1.3883(19) |
| N(1)-C(1)       | 1.3448(17) | C(4)-C(5)      | 1.3857(18) |
| N(1)-C(5)       | 1.3477(17) |                |            |
|                 |            |                |            |
| N(1A)-Pd-N(1)   | 180.00     | C(5)-N(1)-Pd   | 121.38(9)  |
| N(1A)-Pd-Cl(1A) | 89.47(3)   | N(1)-C(1)-C(2) | 123.04(12) |
| N(1)-Pd-Cl(1A)  | 90.53(3)   | C(1)-C(2)-C(3) | 117.27(12) |
| N(1A)-Pd-Cl(1)  | 90.53(3)   | C(1)-C(2)-C(6) | 119.76(12) |
| N(1)-Pd-Cl(1)   | 89.47(3)   | C(3)-C(2)-C(6) | 122.96(12) |
| Cl(1A)-Pd-Cl(1) | 180.00     | C(4)-C(3)-C(2) | 119.95(12) |
| C(1)-N(1)-C(5)  | 119.21(11) | C(5)-C(4)-C(3) | 119.29(12) |
| C(1)-N(1)-Pd    | 119.36(9)  | N(1)-C(5)-C(4) | 121.21(12) |

Table S3. Selected bond distances (Å) and angles (°) for complex IV.

|                 |            |                |            |
|-----------------|------------|----------------|------------|
| Pd-N(1)         | 2.0139(11) | C(1)-C(2)      | 1.377(2)   |
| Pd-N(1A)        | 2.0139(11) | C(2)-C(3)      | 1.397(2)   |
| Pd-Cl(1)        | 2.3054(3)  | C(3)-C(4)      | 1.386(2)   |
| Pd-Cl(1A)       | 2.3054(3)  | C(3)-C(6)      | 1.495(2)   |
| N(1)-C(5)       | 1.3408(18) | C(4)-C(5)      | 1.3813(19) |
| N(1)-C(1)       | 1.3472(19) |                |            |
|                 |            |                |            |
| N(1)-Pd-N(1A)   | 180.00(6)  | C(1)-N(1)-Pd   | 120.87(10) |
| N(1)-Pd-Cl(1)   | 89.48(3)   | N(1)-C(1)-C(2) | 122.27(14) |
| N(1A)-Pd-Cl(1)  | 90.52(3)   | C(1)-C(2)-C(3) | 119.99(14) |
| N(1)-Pd-Cl(1A)  | 90.52(3)   | C(4)-C(3)-C(2) | 116.79(13) |
| N(1A)-Pd-Cl(1A) | 89.48(3)   | C(4)-C(3)-C(6) | 121.82(14) |
| Cl(1)-Pd-Cl(1A) | 180.0      | C(2)-C(3)-C(6) | 121.39(13) |
| C(5)-N(1)-C(1)  | 118.50(12) | C(5)-C(4)-C(3) | 120.68(14) |
| C(5)-N(1)-Pd    | 120.62(9)  | N(1)-C(5)-C(4) | 121.76(13) |

Table S4. Selected bond distances (Å) and angles (°) for complex V.

|                    |            |                    |          |
|--------------------|------------|--------------------|----------|
| Pd-N(1B)           | 2.032(3)   | C(4A)-C(5A)        | 1.375(5) |
| Pd-N(1A)           | 2.034(3)   | N(1B)-C(1B)        | 1.338(4) |
| Pd-Cl(1)           | 2.3036(11) | N(1B)-C(5B)        | 1.360(5) |
| Pd-Cl(2)           | 2.3045(11) | C(1B)-C(2B)        | 1.388(5) |
| N(1A)-C(1A)        | 1.328(5)   | C(1B)-Cl(1B)       | 1.726(4) |
| N(1A)-C(5A)        | 1.405(5)   | C(2B)-C(3B)        | 1.387(6) |
| C(1A)-C(2A)        | 1.402(5)   | C(3B)-C(4B)        | 1.381(6) |
| C(1A)-Cl(1A)       | 1.721(4)   | C(4B)-C(5B)        | 1.379(5) |
| C(2A)-C(3A)        | 1.380(5)   |                    |          |
| C(3A)-C(4A)        | 1.384(5)   |                    |          |
|                    |            |                    |          |
| N(1B)-Pd-N(1A)     | 178.88(12) | C(2A)-C(3A)-C(4A)  | 120.5(3) |
| N(1B)-Pd-Cl(1)     | 89.32(9)   | C(5A)-C(4A)-C(3A)  | 120.5(4) |
| N(1A)-Pd-Cl(1)     | 91.02(9)   | C(4A)-C(5A)-N(1A)  | 119.5(4) |
| N(1B)-Pd-Cl(2)     | 89.93(9)   | C(1B)-N(1B)-C(5B)  | 118.0(3) |
| N(1A)-Pd-Cl(2)     | 89.65(9)   | C(1B)-N(1B)-Pd     | 122.3(2) |
| Cl(1)-Pd-Cl(2)     | 176.17(4)  | C(5B)-N(1B)-Pd     | 119.7(2) |
| C(1A)-N(1A)-C(5A)  | 118.7(3)   | N(1B)-C(1B)-C(2B)  | 123.1(4) |
| C(1A)-N(1A)-Pd     | 123.8(2)   | N(1B)-C(1B)-Cl(1B) | 116.8(3) |
| C(5A)-N(1A)-Pd     | 117.6(2)   | C(2B)-C(1B)-Cl(1B) | 120.1(3) |
| N(1A)-C(1A)-C(2A)  | 123.9(3)   | C(3B)-C(2B)-C(1B)  | 118.6(4) |
| N(1A)-C(1A)-Cl(1A) | 116.5(3)   | C(4B)-C(3B)-C(2B)  | 118.7(3) |
| C(2A)-C(1A)-Cl(1A) | 119.6(3)   | C(5B)-C(4B)-C(3B)  | 119.8(4) |
| C(3A)-C(2A)-C(1A)  | 116.9(4)   | N(1B)-C(5B)-C(4B)  | 121.8(4) |

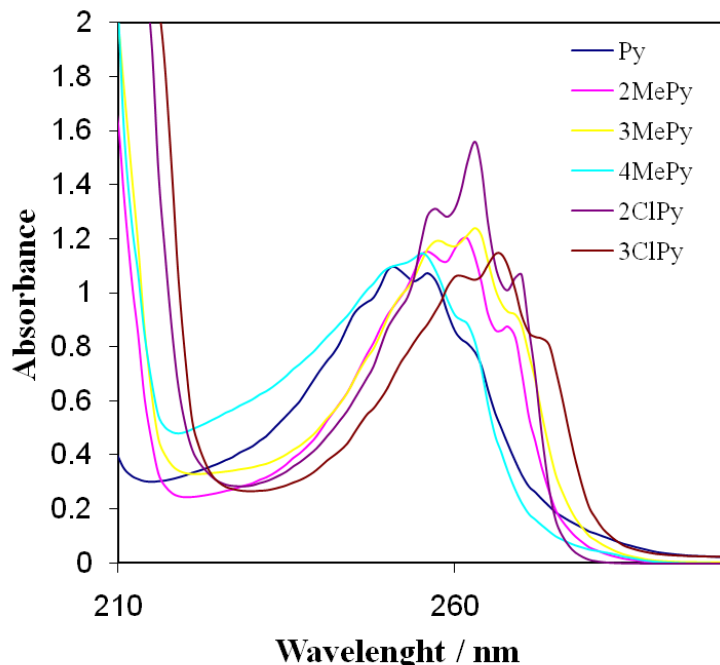

Figure S2. UV-Vis spectra of free XPy ligands.

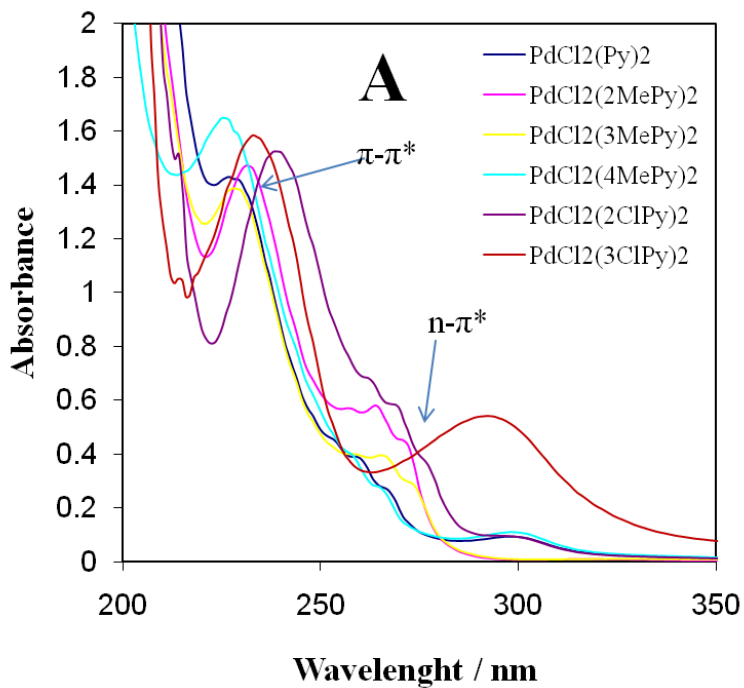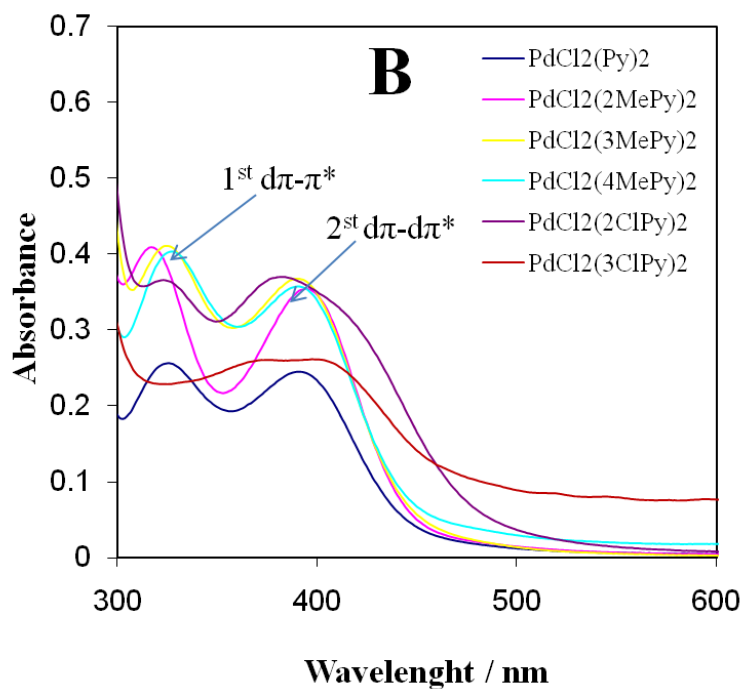

Figure S3. UV-Vis spectra of PdCl<sub>2</sub>(XPy)<sub>2</sub>.

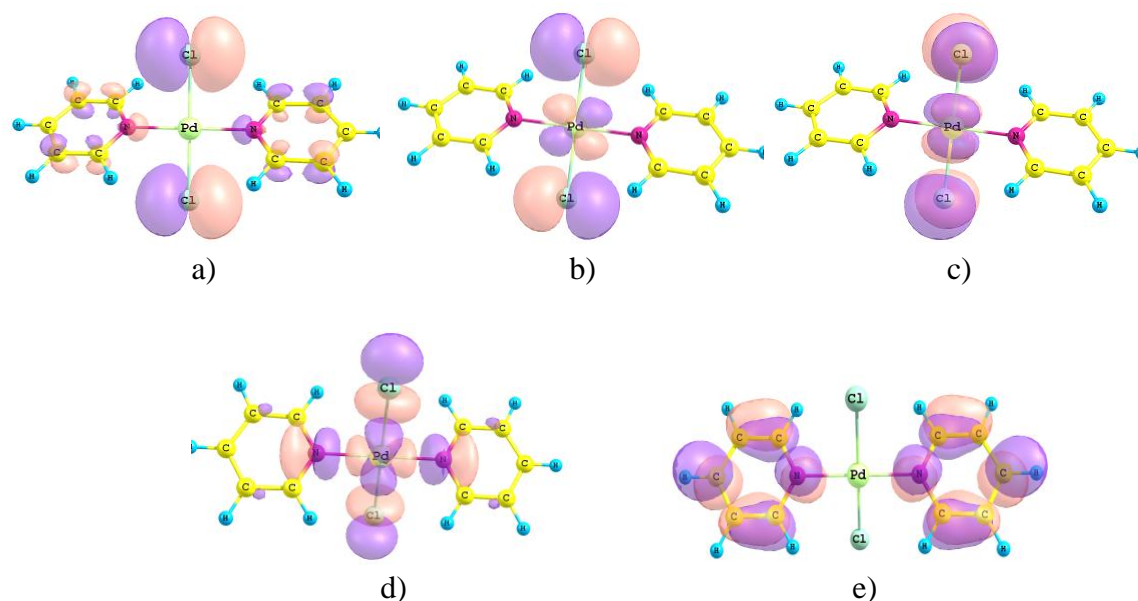

Figure S4. Frontier Orbitals involved in  $d\pi-\pi^*$  transitions in  $\text{PdCl}_2(\text{Py})_2$ : HOMO-3, HOMO-1, HOMO, LUMO and LUMO+1: a) HOMO-3 Cl centered (involved in first  $d\pi-\pi^*$ ), b) HOMO-1 Cl-Pd centered (involved in first  $d\pi-\pi^*$ ), c) HOMO Cl-Pd centered (involved in second  $d\pi-\pi^*$ ), d) LUMO Pd-Cl-3MePy centered (involved in first  $d\pi-\pi^*$ ), e) LUMO+1 3-MePy centered (involved in first and second  $d\pi-\pi^*$ ).

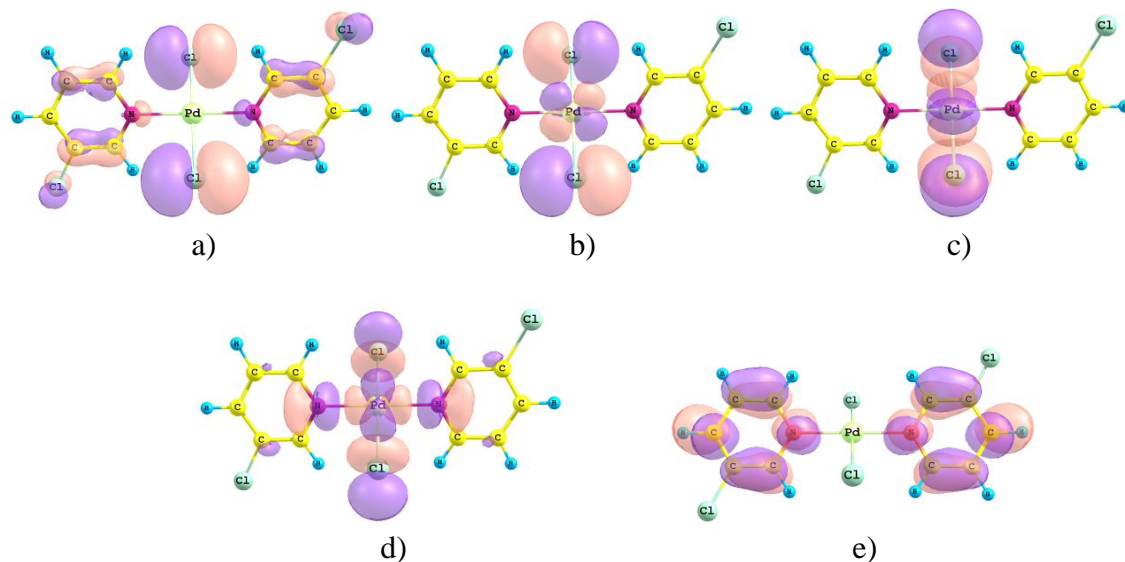

Figure S5. Frontier Orbitals involved in  $d\pi-\pi^*$  transitions in  $\text{PdCl}_2(3\text{-ClPy})_2$ : HOMO-3, HOMO-1, HOMO, LUMO and LUMO+1: a) HOMO-3 Cl centered (involved in first  $d\pi-\pi^*$ ), b) HOMO-1 Cl-Pd centered (involved in first  $d\pi-\pi^*$ ), c) HOMO Cl-Pd centered (involved in second  $d\pi-\pi^*$ ), d) LUMO Pd-Cl-3MePy centered (involved in first  $d\pi-\pi^*$ ), e) LUMO+1 3-MePy centered (involved in first and second  $d\pi-\pi^*$ ).

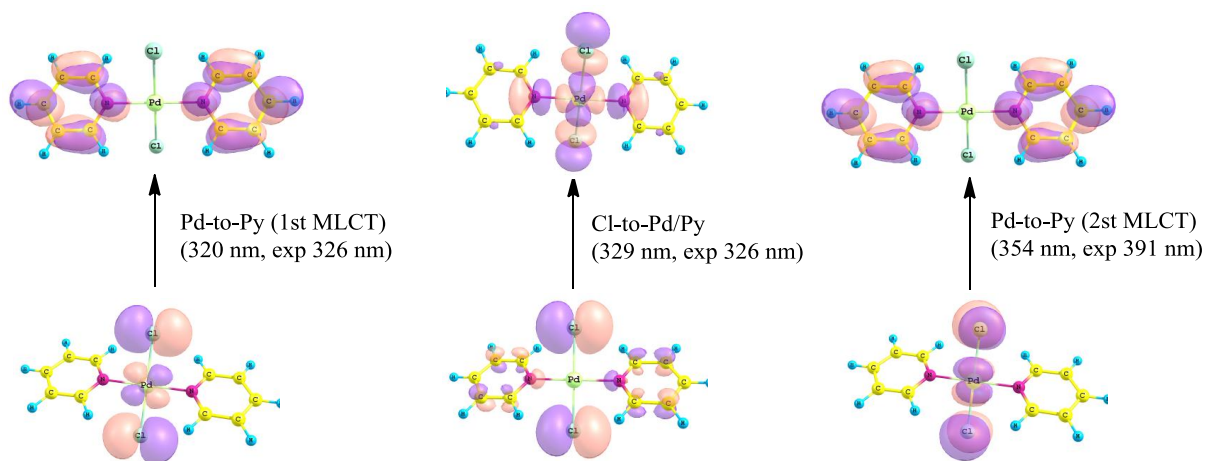

Figure S6. Visualisation of  $d\pi-\pi^*$  transitions in  $\text{PdCl}_2(\text{Py})_2$ .

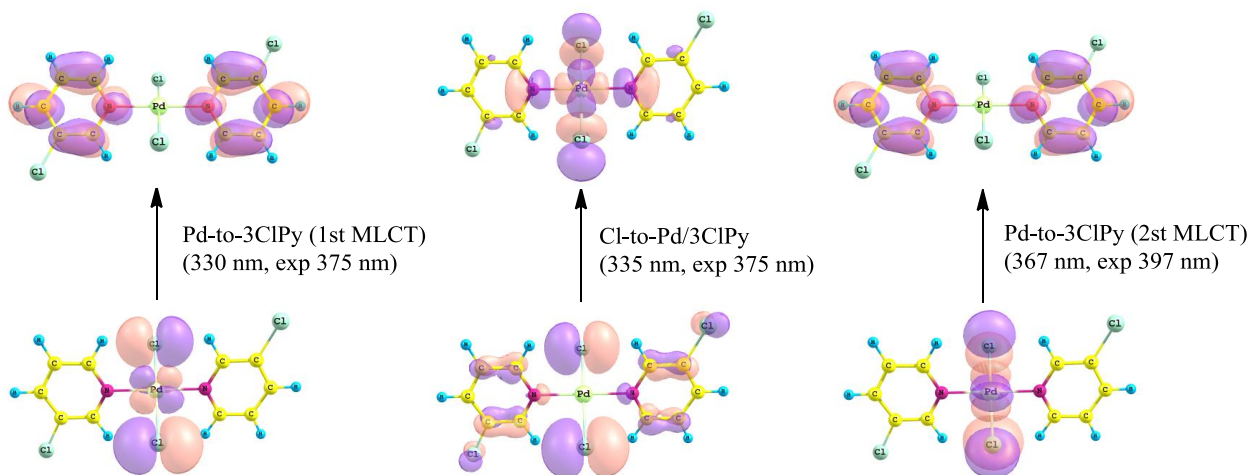

Figure S7. Visualisation of  $d\pi-\pi^*$  transitions in  $\text{PdCl}_2(3\text{-CIPy})_2$ .

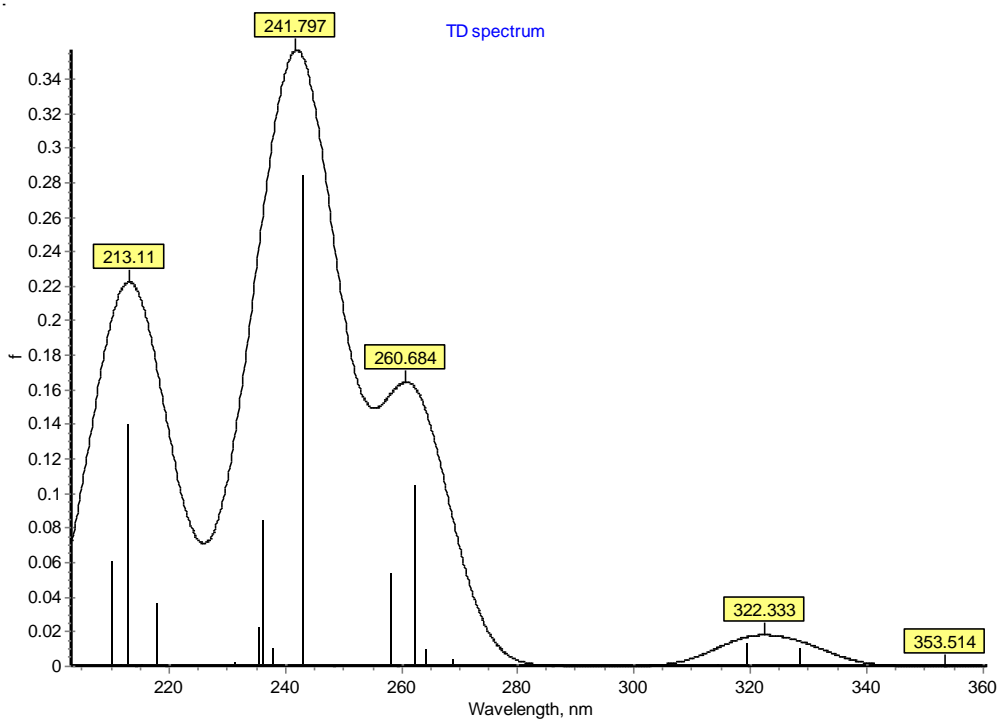

Figure S8. Theoretical UV-Vis spectrum of  $\text{PdCl}_2(\text{Py})_2$ .

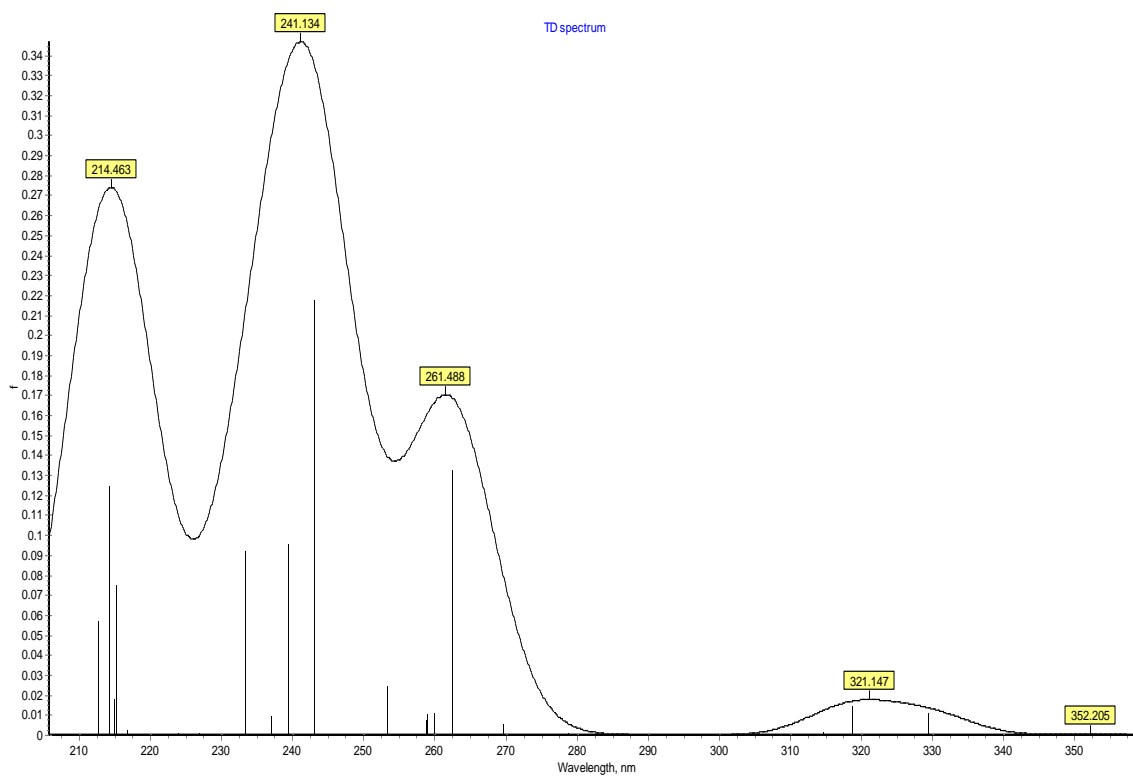

Figure S9. Theoretical UV-Vis spectra of  $\text{PdCl}_2(3\text{-MePy})_2$ .



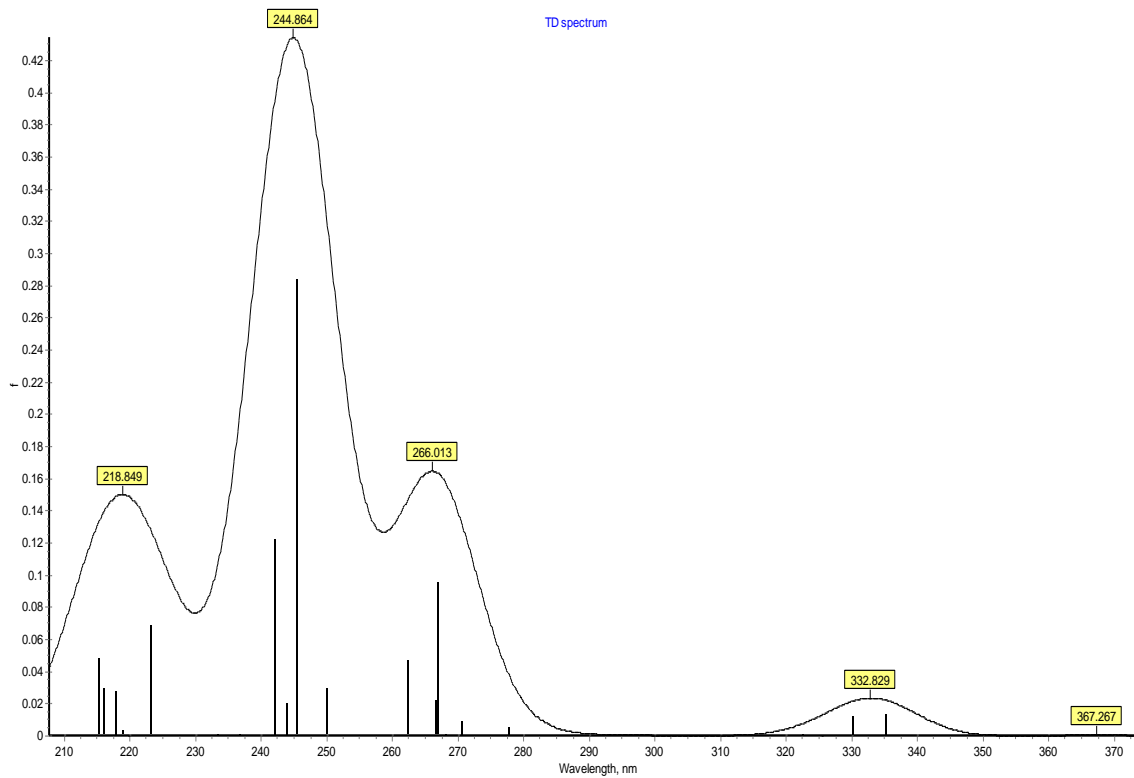

Figure S9. Theoretical UV-Vis spectrum of PdCl<sub>2</sub>(3-CIPy)<sub>2</sub>.
